## **Metal pollutants have additive negative effects on honey bee cognition**

Coline Monchanin<sup>1,2</sup>, Erwann Drujon<sup>1</sup>, Jean-Marc Devaud<sup>1</sup>, Mathieu Lihoreau<sup>1</sup>, Andrew B. Barron<sup>2</sup>

<sup>1</sup>Research Center on Animal Cognition (CRCA), Center for Integrative Biology (CBI); CNRS, University Paul Sabatier – Toulouse III, France

<sup>2</sup>Department of Biological Sciences, Macquarie University, NSW, Australia

Corresponding author: coline.monchanin@univ-tlse3.fr

**Keywords:** *Apis mellifera*, PER conditioning, pollutant interaction, arsenic, lead, copper

### **Summary statement:**

Honey bees displayed reduced learning and memory performance following acute exposure to arsenic, copper or lead. Exposure to combinations of these metals had additive effects.

### **Abstract**

Environmental pollutants can exert sublethal deleterious effects on animals. These include disruption of cognitive functions underlying crucial behaviours. While agrochemicals have been identified as a major threat to pollinators, metal pollutants, which are often found in complex mixtures, have so far been overlooked. Here we assessed the impact of acute exposure to field-realistic concentrations of three common metal pollutants, lead, copper, arsenic, and their combinations, on honey bee appetitive learning and memory. All treatments involving single metals slowed down learning and disrupted memory retrieval at 24 h. Combinations of these metals had additive negative effects on both processes, suggesting common pathways of toxicity. Our results highlight the need to further assess the risks of metal pollution on invertebrates.

## Introduction

Metal pollution is of increasing concern for both ecosystem and public health (Nriagu and Pacyna, 1988). Over the last century, the widespread use of metals in domestic, industrial and agricultural applications (Bradl, 2005) has considerably elevated their concentrations in water (Mance, 1987) and terrestrial habitats (Krämer, 2010; Su et al., 2014) up to potentially toxic levels.

Pollinators, such as honey bees, are directly exposed to metal pollutants when foraging on contaminated nectar and pollen (Perugini et al., 2011; Xun et al., 2018), and while flying through air containing suspended particles (Thimmegowda et al., 2020). Metals accumulate in the bodies of adults (Giglio et al., 2017) and larvae (Balestra et al., 1992), as well as in hive products (Satta et al., 2012). For instance, bioaccumulation of arsenic (As), copper (Cu) and lead (Pb), resulting from metal production industries (Kabir et al., 2012) and mining (Khaska et al., 2018; Lee et al., 2005), is common in both honey bees (Badiou-Bénéteau et al., 2013; Giglio et al., 2017; Goretti et al., 2020) and their honey (Pisani et al., 2008; Terrab et al., 2005).

The deleterious effects of metals on humans (Tchounwou et al., 2012) and some model animals (mice: Cobbina et al., 2015; flies: Doğanlar et al., 2014) are well-known. As, Cu, Pb and other metals have neurotoxic effects that induce neural and neuromuscular alterations, sensory impairments and many other behavioural dysfunctions (Chen et al., 2016). Deficits in cognition and memory have been reported for As (e.g. humans: Tolins et al., 2014; mice: Tyler et al., 2018; Wu et al., 2006), Pb (e.g. mice: Anderson et al., 2016; humans: Mason et al., 2014) and Cu (e.g. mice: Lamtai et al., 2020; Pal et al., 2013; flies: Zamberlan, 2020). Recent studies showed that low doses of Pb (Monchanin et al., 2021a) and selenium (Se) (Burden et al., 2016) also impair behaviour and cognition in honey bees, suggesting a widespread impact on pollinators. So far, however, very little attention has been given to the potential combined effects of co-exposure to different metals (Monchanin et al., 2021b).

Interactions among stressors are commonly classified as antagonistic (when the effect of one stressor reduces the effect of the other one), additive (when stressors have simple cumulative effects) or synergistic (when stressors together have a greater effect than the sum of their individual effects) (Folt et al., 1999). Additive effects of As, Cu and Pb have been described for humans (Lin et al., 2016), rats (Aktar et al., 2017; Mahaffey et al., 1981; Schmolke et al., 1992) and fishes (Verriopoulos and Dimas, 1988). In rats, for example, co-exposure to Pb and As disrupted brain biogenic amine levels (Agrawal et al., 2015). In

humans, it has been hypothesized that combined exposure to Pb and As, or other metal pollutants, have additive or synergistic toxic responses leading to cognitive dysfunction (Karri et al., 2016). To our knowledge, two studies have addressed the impact of metallic cocktails on bee physiology. Honey bees simultaneously exposed to Pb, cadmium (Cd) and Cu accumulated significant levels of these metals in their bodies and had lower brain concentrations of dopamine compared to control honey bees (Nisbet et al., 2018). Cd and Cu exerted a weak synergistic effect on honey bee survival (Di et al., 2020). However, none of these studies investigated potential effects of combined exposure on cognition.

Here we compared the effects of exposure to single metals or ecologically relevant combinations of these metals on honey bee learning and memory. We hypothesised that combinations of metals may have synergistic negative effects, as has been found with pesticides (Yao et al., 2018; Zhu et al., 2017). We tested individual honey bees in a standard protocol of proboscis extension reflex (PER) conditioning following acute exposure to As, Pb and Cu or a combination of them. We tested three concentrations of As, considered the most toxic substance (ATSDR, 2019), and added one concentration of Cu or Pb (binary mixtures), or both (tertiary mixture), to reach the molarity of the As solutions.

## Materials and methods

### *Metal solutions*

Arsenic ( $\text{NaAsO}_2$ ), lead ( $\text{PbCl}_2$ ) and copper ( $\text{CuCl}_2 \cdot 2\text{H}_2\text{O}$ ) were purchased from Sigma-Aldrich Ltd (Lyon, France) and diluted in 50% (w/v) sucrose solution. Control honey bees were fed 50% sucrose solution. Three concentrations of As were used (Table 1): a low concentration ( $0.13 \mu\text{M}$ ) corresponding to the maximal permissible value in drinking water ( $0.01 \text{ mg.L}^{-1}$ ) (Codex Alimentarius, 2015), a high concentration ( $0.67 \mu\text{M}$ ) corresponding to half the maximal permissible value in irrigation water ( $0.1 \text{ mg.L}^{-1}$ ) (Ayers and Westcot, 1994), and an intermediate concentration ( $0.40 \mu\text{M}$ ). This range of concentrations was reported in water sampled from polluted areas (e.g. mining sites) and in honey (Table S1). For Pb and Cu, we chose  $0.27 \mu\text{M}$  ( $0.055 \text{ mg.L}^{-1}$  of Pb and  $0.017 \text{ mg.L}^{-1}$  of Cu) so that the binary combinations (As  $0.13 \mu\text{M}$  + Cu  $0.27 \mu\text{M}$  or As  $0.13 \mu\text{M}$  + Pb  $0.27 \mu\text{M}$ ) could be compared to the As intermediate concentration ( $0.40 \mu\text{M}$ ), and the tertiary combination (As  $0.13 \mu\text{M}$  + Pb  $0.27 \mu\text{M}$  + Cu  $0.27 \mu\text{M}$ ) to the As high concentration ( $0.67 \mu\text{M}$ ) (Table 1). These concentrations of Pb and Cu have also been reported in honey samples (Table S1). The mass consumed for As and the concentrations for Cu and Pb fell within sublethal ranges for the

honey bee: the LD50 of elemental As for NaAsO<sub>2</sub> ranged from 0.330 to 0.540 µg/bee (Fujii, 1980), the LC50 of Cu is 72 mg.L<sup>-1</sup> (Di et al., 2016) and of Pb is 345 mg.L<sup>-1</sup> (Di et al., 2016).

### *Bee exposure to metals*

We collected honey bees (*Apis mellifera*) returning from foraging trips at the entrance of five different hives in mornings during August 2020. We anesthetised the bees on ice and harnessed them in plastic tubes, secured with tape and a droplet of wax at the back of the head (Matsumoto et al., 2012). We tested all bees for intact proboscis extension (PER) by stimulating their antennae with 50% sucrose. We then fed the responding honey bees 5 µL of 50% sucrose solution (see Table 1), making sure they consumed the whole droplet, and left them to rest for 3 h in the incubator (temperature: 25±2°C, humidity: 60%). Honey bees that did not respond to the sucrose solution were discarded.

### *Absolute learning*

Prior to conditioning, we tested all honey bees for PER by stimulating their antennae with 50% sucrose solution, and kept only those that displayed the reflex. We then performed olfactory absolute conditioning according to a standard protocol using an automatic stimulus delivery system (Aguiar et al., 2018). Honey bees had to learn to respond to an olfactory conditioned stimulus (CS, 1-nonanol, Sigma-Aldrich Ltd, Lyon, France) reinforced with the unconditioned stimulus (US, 50% sucrose solution), over five conditioning trials with a ten-minute inter-trial interval. Each trial (37 s in total) began when a bee was placed in front of the stimulus delivery system, which released a continuous flow of clean air (3,300 mL.min<sup>-1</sup>) to the antennae. After 15 s, the odour was introduced into the airflow for 4 s, the last second of which overlapped with sucrose presentation to the antennae using a toothpick. This was immediately followed by feeding for 4 s by presenting the toothpick to the proboscis. The bee remained for another 15 s under the clean airflow. We recorded the presence or absence (1/0) of a conditioned PER in response to the odorant presentation during each conditioning trial. Honey bees spontaneously responding in the first conditioning trial were discarded from the analysis. The sum of conditioned responses over all trials provided an individual acquisition score (between 0 and 4), and honey bees responding at the last trial were categorized as learners.

### *Long-term memory*

Only honey bees that had learnt the task were kept for the analysis of memory performance. After conditioning, these honey bees were fed 15  $\mu\text{L}$  of 50% sucrose solution, left overnight in the incubator, and fed another 5  $\mu\text{L}$  of sucrose solution the following morning. Three hours later (24 h post-conditioning), we performed the retention test, consisting of three trials similar to conditioning except that no sucrose reward was presented. In addition to the odour used during the conditioning (CS), we presented two novel odours, in randomized order, to assess the specificity of the memory: nonanal was expected to be perceived by honey bees as similar to 1-nonanol, while 1-hexanol was expected to be perceived differently (Guerrieri et al., 2005). We recorded the presence or absence (1/0) of a conditioned PER to each odorant at each memory retention trial. We classified honey bees according to their response patterns: response to the CS only, response to the CS and the similar odour (low generalization level), response to all odours (high generalization level), no or inconsistent response.

### *Statistics*

We analysed the data using R Studio v.1.2.5033 (RStudio Team, 2015). Raw data are available in Dataset S1. We performed binomial generalised linear mixed-effects models (GLMM) (package lme4; Bates et al., 2015), with hive and conditioning date as random factors and treatment as a fixed effect. Using the GLMMs, we evaluated whether molarity or treatment impacted the initial response to antennal stimulation, the spontaneous response in the first conditioning trial, the response in the last trial, the response to each odorant during the memory test, the proportion of honey bees per response pattern in the retention test, and the survival at 24 h. Acquisition scores were standardised and compared with GLMMs using Template Model Builder (Brooks et al., 2017). For all response variables, we compared (1) the treated groups to the control, (2) groups exposed to concentrations of the same molarity (e.g. Med [As], [As+Cu] and [As+Pb]), (3) the separate and joint effects of the treatments (e.g. Low [As], [Cu] and [As+Cu]) in order to identify interactive effects (antagonistic, additive, synergistic).

## Results and discussion

### *Exposure to metals did not impact appetitive motivation*

The proportion of honey bees that responded to the initial antennal stimulation with sucrose was similar among treatments (GLMM:  $p > 0.05$ ). Therefore, treatment did not affect appetitive motivation or sucrose perception. Consistent with our observations, the ingestion of similar concentrations of Pb and Cu had no effect on responsiveness to increasing concentrations of sucrose (Burden et al., 2019). By contrast, Di et al. (2020) found that honey bees exposed to increasing concentrations of a mixture of Cu and Cd exhibited a decreased ability to distinguish sucrose concentrations, but this may be explained by the much higher (at least 600 times) concentrations used in that study. Thus, in our conditions any impact on appetitive learning is unlikely due to a decreased motivation for sucrose or sucrose perception.

### *Individual and joint exposures to metals reduced learning performance*

Two out of the 381 honey bees submitted to the absolute learning task spontaneously responded to the first odour presentation and were therefore discarded. In all groups, the number of honey bees showing the conditioned response increased over trials, thus showing learning (Fig. 1A). However, fewer honey bees exposed to metals learned the task when compared to controls (GLMM:  $p < 0.05$ , except for Low [As],  $p = 0.082$ ). Accordingly, the acquisition scores of honey bees from all treatments were lower than controls (Fig. 1B). Honey bees exposed to Med [As] (GLMM:  $-0.610 \pm 0.246$ ,  $p = 0.013$ ), High [As] (GLMM:  $-0.639 \pm 0.241$ ,  $p = 0.008$ ) and [As+Cu+Pb] (GLMM:  $-0.592 \pm 0.244$ ,  $p = 0.015$ ) had acquisition scores significantly lower than controls. Honey bees exposed to solutions of [As+Pb] had similar acquisition scores to Med [As] (GLMM:  $0.299 \pm 0.234$ ,  $p = 0.201$ ), but honey bees exposed to [As+Cu] performed better (GLMM:  $0.596 \pm 0.241$ ,  $p = 0.013$ ). Honey bees exposed to High [As] and [As+Cu+Pb] exhibited similar acquisition scores (GLMM:  $p = 0.810$ ). We found no difference in the acquisition scores and the proportions of learners between honey bees treated with a single metal and mixed treatments (GLMM:  $p > 0.05$ ), that would have indicated non-additive effects (i.e. antagonistic or synergistic). Thus, exposure to metals significantly reduced learning performance, and combined exposure appeared to exert simple additive deleterious effects.

### *Individual and joint exposures to metals reduced long-term memory specificity*

To examine possible effects of metal exposure on memory retention, we tested memory 24 h past training. Only honey bees that had learned the CS-US association at the end of conditioning were tested. 167 out of the 379 honey bees submitted to the absolute learning task did not learn and were therefore not included in the memory test.

We found no effect of treatment on survival at 24 h (GLMM:  $p > 0.05$ ). However, long-term memory was significantly affected (Fig. 2). Overall, treated honey bees responded less to the learned odorant (CS) than controls, as indicated by a significant effect of exposure to metals on retention levels (GLMM:  $p < 0.05$ ) (Fig. 2A). Yet, this decrease was not significant for honey bees exposed to Med [As] (GLMM:  $-0.260 \pm 0.628$ ,  $p = 0.679$ ) and High [As] (GLMM:  $-1.023 \pm 0.570$ ,  $p = 0.073$ ). Finally, there was no clear dose effect on responses to the CS among treated groups (GLMM:  $-0.576 \pm 0.579$ ,  $p = 0.320$ ).

Individual response patterns (Fig. 2B) revealed a loss of memory specificity. While honey bees from all treatments responded similarly to the similar odour (GLMM:  $p > 0.05$ ), those exposed to higher doses responded more frequently to all odorants, indicating a higher degree of response generalization (GLMM:  $1.954 \pm 0.775$ ,  $p = 0.012$ ). This was accompanied by a significantly lower proportion of specific (CS-only) responses for honey bees exposed to [Pb] (GLMM:  $-1.795 \pm 0.690$ ,  $p = 0.009$ ), low [As] (GLMM:  $-1.313 \pm 0.589$ ,  $p = 0.026$ ) and [As+Cu+Pb] (GLMM:  $-1.200 \pm 0.588$ ,  $p = 0.041$ ). Exposure also significantly increased the frequency of inconsistent responses as compared to controls (GLMM:  $p < 0.05$ ). This was the case for each individual treatment except for Med [As],  $p = 0.293$ ). Thus, exposure to metals had a negative impact on memory performance at 24h. The analysis of individual response patterns also revealed additive effects as they did not differ among groups exposed to solutions with the same molarity, nor between single and mixed metal treatments (GLMM:  $p > 0.05$ ). Thus, most treatments reduced memory performance at 24h.

### *The additive effects of metal mixtures may be explained by common pathways of toxicity*

Although many mechanisms of metal toxicity have not yet been elucidated, some points of consensus are emerging from the literature. Firstly, interactions between metals can occur in the environment of the organism (Grobelać and Kowalska, 2020; Noyes and Lema, 2015), and during uptake into the organism, leading to potentially toxic processes of speciation, absorption, binding, transport and distribution (Wu et al., 2016). Once metals enter an organism, they can induce, alter or inhibit a range of biological responses and metabolic



pathways. For example, by mimicking other essential metals (Bridges and Zalups, 2005) or damaging the permeability of biological membranes (Rothshein, 1959), metals enable the uptake or loss of other compounds from intracellular compartments (Viarengo, 1994). Metals are also known to disrupt signalling and calcium homeostasis (particularly important in neurons) by interfering with calcium channels (Bridges and Zalups, 2005; Chavez-Crooker et al., 2001; Tamano and Takeda, 2011). This might lead to dysfunction and cytotoxicity due to the disruption of cell signalling and calcium homeostasis. Genotoxicity (Doğanlar et al., 2014) may be achieved through covalent binding to DNA (Brocato and Costa, 2013; Senut et al., 2014). Eventually, oxidative stress and lipid peroxidation of the cell membrane may lead to neuronal death. Additionally, metals in mixtures could interact at target sites, but the effect on toxicity of that interaction is largely unknown (Svendsen et al., 2011). Metal mixtures could change the bioavailability (Gong et al., 2020), toxicokinetics and toxicodynamics (Gao et al., 2016) of each metal, that could impact the toxicity for the organism (Løkke et al., 2013). Based on these shared mechanisms of toxicity that include oxidative stress (Nikolić et al., 2016; Zaman et al., 1995), apoptosis (Raes et al., 2000) and interference with neurotransmitters (Nisbet et al., 2018), the toxic effects of metal pollutants in mixtures is expected to be additive (von Stackelberg et al., 2013). Of note, these conclusions emerge from studies mostly conducted on vertebrates, thus possibly leaving aside specificities of meta actions in invertebrate organisms.

Metal mixtures may affect many aspects of neural activity and brain function in honey bees, as in other species (Karri et al., 2016). Here, we focused on learning and memory of olfactory cues because they play crucial roles in the behavioural ecology of honey bees and other pollinators, for the identification of food resources. Our results in controlled laboratory conditions suggest that exposure to sublethal combinations of toxic elements in the field might alter individual foraging efficiency, and in turn jeopardize survival of pollinator populations. While we could not identify interactive effects in such conditions, this will need to be confirmed in field experiments where exposure conditions will differ and affect a broader range of behavioural responses (flight activity, navigation). Our approach means to fill a gap in the evaluation of joint actions of metals (Meyer et al., 2015), which appears necessary to better assess the risks they represent (Nys et al., 2018; Otitoloju, 2003) and better inform regulatory frameworks (European Commission, 2012). Current risk assessment guidance mainly assesses the effect of individual exposure, which fails to capture potential interactive effects. This is of particular importance for honey bees and many other species, where contaminated food is transferred and shared among individuals. Hence, the evaluation



of metal mixture impacts and their modes of action needs to be developed (Sasso et al., 2010). Besides, interactions between toxic metals and environmental factors (Naqash et al., 2020) as well as with other chemicals (EFSA Scientific Committee et al., 2019) (e.g. pesticides (Sgolastra et al., 2018; Singh et al., 2017), volatile organic compounds (Sasso et al., 2010) etc.) should be implemented in an integrated research framework.

## **Conclusion**

In summary, we demonstrated that arsenic, lead, copper or combinations of these metals, at levels found in the environment, slow down appetitive learning and reduce long-term memory specificity in honey bees. These metals show simple additive effects as we found no differences between different solutions of the same molarity suggesting possible non-linear effects (synergism or antagonism). Thus, regarding effects on learning and memory, concentration seems to be more important than identity of any specific metal. Since learning and memory of olfactory cues play crucial roles in the behavioural ecology of honey bees, acute exposure to metal pollutants mixtures could impair fundamental hive function and population growth.

## **Acknowledgments**

We thank Olivier Fernandez for assistance with beekeeping.

## **Competing interests**

The authors declare no competing or financial interests.

## **Funding**

This work was supported by the CNRS. CM was funded by a PhD fellowship from French Ministry of Higher Education, Research and Innovation. ABB was funded by a Future Fellowship from the Australian Research Council (FT140100452) and the Eldon and Anne Foote Trust. ML was funded by grants of the Agence Nationale de la Recherche (ANR-16-CE02-0002-01, ANR-19-CE37-0024, ANR-20-ERC8-0004-01) and the European Regional Development Fund (project ECONECT).

## **Data availability**

Raw data will be available on Dryad repository upon publication.

## References

- Agrawal, S., Bhatnagar, P. and Flora, S. J. S.** (2015). Changes in tissue oxidative stress, brain biogenic amines and acetylcholinesterase following co-exposure to lead, arsenic and mercury in rats. *Food Chem. Toxicol.* **86**, 208–216.
- Aguiar, J. M. R. B. V., Roselino, A. C., Sazima, M. and Giurfa, M.** (2018). Can honey bees discriminate between floral-fragrance isomers? *J. Exp. Biol.* **221**, jeb180844.
- Aktar, S., Jahan, M., Alam, S., Mohanto, N. C., Arefin, A., Rahman, A., Haque, A., Himeno, S., Hossain, K. and Saud, Z. A.** (2017). Individual and combined effects of arsenic and lead on behavioral and biochemical changes in mice. *Biol. Trace Elem. Res.* **177**, 288–296.
- Anderson, D. W., Mettil, W. and Schneider, J. S.** (2016). Effects of low level lead exposure on associative learning and memory in the rat: Influences of sex and developmental timing of exposure. *Toxicol. Lett.* **246**, 57–64.
- ATSDR** (2019). The ATSDR 2019 Substance Priority List.
- Ayers, R. S. and Westcot, D. W.** (1994). *Water quality for agriculture*. Food and Agriculture Organization of the United Nations, Rome.
- Badiou-Bénéteau, A., Benneveau, A., Géret, F., Delatte, H., Becker, N., Brunet, J. L., Reynaud, B. and Belzunces, L. P.** (2013). Honeybee biomarkers as promising tools to monitor environmental quality. *Environ. Int.* **60**, 31–41.
- Balestra, V., Celli, G. and Porrini, C.** (1992). Bees, honey, larvae and pollen in biomonitoring of atmospheric pollution. *Aerobiologia* **8**, 122–126.
- Bates, D., Mächler, M., Bolker, B. and Walker, S.** (2015). Fitting linear mixed-effects models using lme4. *J. Stat. Softw.* **67**, 1–48.
- Bradl, H. B.** (2005). Sources and origins of heavy metals. In *Interface Science and Technology* (ed. Bradl, H. B.), pp. 1–27. Elsevier.
- Bridges, C. C. and Zalups, R. K.** (2005). Molecular and ionic mimicry and the transport of toxic metals. *Toxicol. Appl. Pharmacol.* **204**, 274–308.
- Brocato, J. and Costa, M.** (2013). Basic mechanics of DNA methylation and the unique landscape of the DNA methylome in metal-induced carcinogenesis. *Crit. Rev. Toxicol.* **43**, 493–514.
- Brooks, M. E., Kristensen, K., van Benthem, K. J., Magnusson, A., Berg, C., W., Nielsen, A., Skaug, H., J., Maechler, M. and Bolker, B., M.** (2017). glmmTMB balances speed and flexibility among packages for zero-inflated generalized linear mixed modeling. *R J.* **9**, 378–400.
- Burden, C. M., Elmore, C., Hladun, K. R., Trumble, J. T. and Smith, B. H.** (2016). Acute exposure to selenium disrupts associative conditioning and long-term memory recall in honey bees (*Apis mellifera*). *Ecotoxicol. Environ. Saf.* **127**, 71–79.
- Burden, C. M., Morgan, M. O., Hladun, K. R., Amdam, G. V., Trumble, J. J. and Smith, B. H.** (2019). Acute sublethal exposure to toxic heavy metals alters honey bee (*Apis mellifera*) feeding behavior. *Sci. Rep.* **9**, 4253.
- Chavez-Crooker, P., Garrido, N. and Ahearn, G. A.** (2001). Copper transport by lobster hepatopancreatic epithelial cells separated by centrifugal elutriation: measurements with the fluorescent dye Phen Green. *J. Exp. Biol.* **204**, 1433.
- Chen, P., Miah, M. R. and Aschner, M.** (2016). Metals and neurodegeneration. *F1000Research* **5**, 366.
- Codex Alimentarius** (2015). *Codex general standard for contaminants and toxins in food and feed - CODEX STAN 193-1995*. Joint FAO/WHO.

- Di, N., Hladun, K. R., Zhang, K., Liu, T.-X. and Trumble, J. T.** (2016). Laboratory bioassays on the impact of cadmium, copper and lead on the development and survival of honeybee (*Apis mellifera* L.) larvae and foragers. *Chemosphere* **152**, 530–538.
- Di, N., Zhang, K., Hladun, K. R., Rust, M., Chen, Y.-F., Zhu, Z.-Y., Liu, T.-X. and Trumble, J. T.** (2020). Joint effects of cadmium and copper on *Apis mellifera* foragers and larvae. *Comp. Biochem. Physiol. Part C Toxicol. Pharmacol.* **237**, 108839.
- Doğanlar, Z. B., Doğanlar, O. and Tabakçioğlu, K.** (2014). Genotoxic effects of heavy metal mixture in *Drosophila melanogaster*: Expressions of heat shock proteins, RAPD profiles and mitochondrial DNA sequence. *Water. Air. Soil Pollut.* **225**, 2104.
- EFSA Scientific Committee, More, S. J., Bampidis, V., Benford, D., Bennekou, S. H., Bragard, C., Halldorsson, T. I., Hernández-Jerez, A. F., Koutsoumanis, K., Naegeli, H., et al.** (2019). Guidance on harmonised methodologies for human health, animal health and ecological risk assessment of combined exposure to multiple chemicals. *EFSA J.* **17**, e05634.
- European Commission** (2012). Scientific Committee on Health and Environmental Risks. Toxicity and assessment of chemical mixtures.
- Folt, C. L., Chen, C. Y., Moore, M. V. and Burnaford, J.** (1999). Synergism and antagonism among multiple stressors. *Limnol. Oceanogr.* **44**, 864–877.
- Fujii, L. K.** (1980). Oral dose toxicity vs. tissue residue levels of arsenic in the honey bee (*Apis mellifera* L.).
- Gao, Y., Feng, J., Han, F. and Zhu, L.** (2016). Application of biotic ligand and toxicokinetic–toxicodynamic modeling to predict the accumulation and toxicity of metal mixtures to zebrafish larvae. *Environ. Pollut.* **213**, 16–29.
- Giglio, A., Ammendola, A., Battistella, S., Naccarato, A., Pallavicini, A., Simeon, E., Tagarelli, A. and Giulianini, P. G.** (2017). *Apis mellifera ligustica*, Spinola 1806 as bioindicator for detecting environmental contamination: a preliminary study of heavy metal pollution in Trieste, Italy. *Environ. Sci. Pollut. Res.* **24**, 659–665.
- Gong, B., Qiu, H., Romero-Freire, A., Van Gestel, C. A. M. and He, E.** (2020). Incorporation of chemical and toxicological availability into metal mixture toxicity modeling: state of the art and future perspectives. *Crit. Rev. Environ. Sci. Technol.* 1–45.
- Goretti, E., Pallottini, M., Rossi, R., La Porta, G., Gardi, T., Cenci Goga, B. T., Elia, A. C., Galletti, M., Moroni, B., Petroselli, C., et al.** (2020). Heavy metal bioaccumulation in honey bee matrix, an indicator to assess the contamination level in terrestrial environments. *Environ. Pollut.* **256**, 113388.
- Grobelak, A. and Kowalska, A.** (2020). Heavy metal mobility in soil under futuristic climatic conditions. In *Climate Change and Soil Interactions* (ed. Pietrzykowski, M.) and Prasad, M. N. V.), pp. 437–451. Elsevier.
- Guerrieri, F., Schubert, M., Sandoz, J.-C. and Giurfa, M.** (2005). Perceptual and neural olfactory similarity in honeybees. *PLoS Biol.* **3**, e60.

- Kabir, E., Ray, S., Kim, K.-H., Yoon, H.-O., Jeon, E.-C., Kim, Y. S., Cho, Y.-S., Yun, S.-T. and Brown, R. J. C.** (2012). Current status of trace metal pollution in soils affected by industrial activities. *Sci. World J.* **2012**, 1–18.
- Karri, V., Schuhmacher, M. and Kumar, V.** (2016). Heavy metals (Pb, Cd, As and MeHg) as risk factors for cognitive dysfunction: a general review of metal mixture mechanism in brain. *Environ. Toxicol. Pharmacol.* **48**, 203–213.
- Khaska, M., Le Gal La Salle, C., Sassine, L., Cary, L., Bruguier, O. and Verdoux, P.** (2018). Arsenic and metallic trace elements cycling in the surface water-groundwater-soil continuum down-gradient from a reclaimed mine area: isotopic imprints. *J. Hydrol.* **558**, 341–355.
- Krämer, U.** (2010). Metal hyperaccumulation in plants. *Annu. Rev. Plant Biol.* **61**, 517–534.
- Lamtai, M., Zghari, O., Ouakki, S., Marmouzi, I., Mesfioui, A., El Hessni, A. and Ouichou, A.** (2020). Chronic copper exposure leads to hippocampus oxidative stress and impaired learning and memory in male and female rats. *Toxicol. Res.* **36**, 359–366.
- Lee, J.-S., Chon, H.-T. and Kim, K.-W.** (2005). Human risk assessment of As, Cd, Cu and Zn in the abandoned metal mine site. *Environ. Geochem. Health* **27**, 185–191.
- Lin, X., Gu, Y., Zhou, Q., Mao, G., Zou, B. and Zhao, J.** (2016). Combined toxicity of heavy metal mixtures in liver cells. *J. Appl. Toxicol.* **36**, 1163–1172.
- Løkke, H., Ragas, A. M. J. and Holmstrup, M.** (2013). Tools and perspectives for assessing chemical mixtures and multiple stressors. *Toxicology* **313**, 73–82.
- Mahaffey, K. R., Capar, S. G., Gladen, B. C. and Fowler, B. A.** (1981). Concurrent exposure to lead, cadmium, and arsenic: effects on toxicity and tissue metal concentrations in the rat. *J. Lab. Clin. Med.* **98**, 463–481.
- Mance, G.** (1987). *Pollution threat of heavy metals in aquatic environments*. (ed. Mellanby, K.) The Netherlands: Springer Science & Business Media.
- Mason, L. H., Harp, J. P. and Han, D. Y.** (2014). Pb neurotoxicity: neuropsychological effects of lead toxicity. *BioMed Res. Int.* **2014**, 1–8.
- Matsumoto, Y., Menzel, R., Sandoz, J.-C. and Giurfa, M.** (2012). Revisiting olfactory classical conditioning of the proboscis extension response in honey bees: A step toward standardized procedures. *J. Neurosci. Methods* **211**, 159–167.
- Meyer, J. S., Farley, K. J. and Garman, E. R.** (2015). Metal mixtures modeling evaluation project: background. *Environ. Toxicol. Chem.* **34**, 726–740.
- Monchanin, C., Blanc-Brude, A., Drujont, E., Negahi, M. M., Pasquaretta, C., Silvestre, J., Baqué, D., Elger, A., Barron, A. B., Devaud, J.-M., et al.** (2021a). Chronic exposure to trace lead impairs honey bee learning. *Ecotoxicol. Environ. Saf.* **212**, 112008.
- Monchanin, C., Devaud, J.-M., Barron, A. and Lihoreau, M.** (2021b). Current permissible levels of heavy metal pollutants harm terrestrial invertebrates. *Sci. Total Environ.* **779**, 146398.
- Naqash, N., Prakash, S., Kapoor, D. and Singh, R.** (2020). Interaction of freshwater microplastics with biota and heavy metals: a review. *Environ. Chem. Lett.* **18**, 1813–1824.
- Nikolić, T. V., Kojić, D., Orčić, S., Batinić, D., Vukašinić, E., Blagojević, D. P. and Purać, J.** (2016). The impact of sublethal concentrations of Cu, Pb and Cd on honey bee redox status, superoxide dismutase and catalase in laboratory conditions. *Chemosphere* **164**, 98–105.
- Nisbet, C., Guler, A., Ormanci, N. and Cenesiz, S.** (2018). Preventive action of zinc against heavy metals toxicity in honeybee. *Afr. J. Biochem. Res.* **12**, 1–6.
- Noyes, P. D. and Lema, S. C.** (2015). Forecasting the impacts of chemical pollution and climate change interactions on the health of wildlife. *Curr. Zool.* **61**, 669–689.
- Nriagu, J. O. and Pacyna, J. M.** (1988). Quantitative assessment of worldwide contamination of air, water and soils by trace metals. *Nature* **333**, 134–139.

- Nys, C., Van Regenmortel, T., Janssen, C. R., Oorts, K., Smolders, E. and De Schamphelaere, K. A. C. (2018). A framework for ecological risk assessment of metal mixtures in aquatic systems: Ecological risk assessment framework for metal mixtures. *Environ. Toxicol. Chem.* **37**, 623–642.
- Otitoloju, A. A. (2003). Relevance of joint action toxicity evaluations in setting realistic environmental safe limits of heavy metals. *J. Environ. Manage.* **67**, 121–128.
- Pal, A., Badyal, R. K., Vasishta, R. K., Attri, S. V., Thapa, B. R. and Prasad, R. (2013). Biochemical, histological, and memory impairment effects of chronic copper toxicity: a model for non-wilsonian brain copper toxicosis in wistar rat. *Biol. Trace Elem. Res.* **153**, 257–268.
- Perugini, M., Manera, M., Grotta, L., Abete, M. C., Tarasco, R. and Amorena, M. (2011). Heavy metal (Hg, Cr, Cd, and Pb) contamination in urban areas and wildlife reserves: honeybees as bioindicators. *Biol. Trace Elem. Res.* **140**, 170–176.
- Pisani, A., Protano, G. and Riccobono, F. (2008). Minor and trace elements in different honey types produced in Siena County (Italy). *Food Chem.* **107**, 1553–1560.
- Raes, H., Braeckman, B. P., Criel, G. R. J., Rzeznik, U. and Vanfleteren, J. R. (2000). Copper induces apoptosis in *Aedes C6/36* cells. *J. Exp. Zool.* **286**, 1–12.
- Rothsheim, A. (1959). Cell membrane as site of action of heavy metals. *Fed. Proc.* **18**, 1026–1038.
- RStudio Team (2015). RStudio: integrated development for R. RStudio, Inc., Boston, MA URL <http://www.rstudio.com/>.
- Sasso, A. F., Isukapalli, S. S. and Georgopoulos, P. G. (2010). A generalized physiologically-based toxicokinetic modeling system for chemical mixtures containing metals. *Theor. Biol. Med. Model.* **7**, 17.
- Satta, A., Verdinelli, M., Ruiu, L., Buffa, F., Salis, S., Sassu, A. and Floris, I. (2012). Combination of beehive matrices analysis and ant biodiversity to study heavy metal pollution impact in a post-mining area (Sardinia, Italy). *Environ. Sci. Pollut. Res.* **19**, 3977–3988.
- Schmolke, G., Elsenhans, B., Ehtechami, C. and Forth, W. (1992). Arsenic-copper interaction in the kidney of the rat. *Hum. Exp. Toxicol.* **11**, 315–321.
- Senut, M.-C., Sen, A., Cingolani, P., Shaik, A., Land, S. J. and Ruden, D. M. (2014). Lead exposure disrupts global DNA methylation in human embryonic stem cells and alters their neuronal differentiation. *Toxicol. Sci.* **139**, 142–161.
- Sgolastra, F., Blasioli, S., Renzi, T., Tosi, S., Medrzycki, P., Molowny-Horas, R., Porrini, C. and Braschi, I. (2018). Lethal effects of Cr(III) alone and in combination with propiconazole and clothianidin in honey bees. *Chemosphere* **191**, 365–372.
- Singh, N., Gupta, V. K., Kumar, A. and Sharma, B. (2017). Synergistic effects of heavy metals and pesticides in living systems. *Front. Chem.* **5**, 70.
- Su, C., Jiang, L. and Zhang, W. (2014). A review on heavy metal contamination in the soil worldwide: situation, impact and remediation techniques. *Environ. Skept. Crit.* **3**, 24–38.
- Svendsen, C., Jager, T., Haddad, S., Yang, R., Dorne, J., Broerse, M. and Kramarz, P. (2011). Toxicokinetics and toxicodynamics. In *Mixture toxicity: linking approaches from ecological and human toxicology* (ed. Van Gestel, C. A.), Jonker, M.), Kammenga, J. E.), Laskowski, R.), and Svendsen, C.), pp. 47–93. New York, NY, USA: CRC press.
- Tamano, H. and Takeda, A. (2011). Dynamic action of neurometals at the synapse. *Metallomics* **3**, 656.
- Tchounwou, P. B., Yedjou, C. G., Patlolla, A. K. and Sutton, D. J. (2012). Heavy metal toxicity and the environment. In *Molecular, Clinical and Environmental Toxicology* (ed. Luch, A.), pp. 133–164. Basel: Springer Basel.



- Terrab, A., Recamales, A., Gonzalezmiret, M. and Heredia, F.** (2005). Contribution to the study of avocado honeys by their mineral contents using inductively coupled plasma optical emission spectrometry. *Food Chem.* **92**, 305–309.
- Thimmegowda, G. G., Mullen, S., Sottolare, K., Sharma, A., Mohanta, S. S., Brockmann, A., Dhandapany, P. S. and Olsson, S. B.** (2020). A field-based quantitative analysis of sublethal effects of air pollution on pollinators. *Proc. Natl. Acad. Sci. USA* **117**, 20653–20661.
- Tolins, M., Ruchirawat, M. and Landrigan, P.** (2014). The developmental neurotoxicity of arsenic: cognitive and behavioral consequences of early life exposure. *Ann. Glob. Health* **80**, 303–314.
- Tyler, C. R. S., Smoake, J. J. W., Solomon, E. R., Villicana, E., Caldwell, K. K. and Allan, A. M.** (2018). Sex-dependent effects of the histone deacetylase inhibitor, sodium valproate, on reversal learning after developmental arsenic exposure. *Front. Genet.* **9**, 1–14.
- Verriopoulos, G. and Dimas, S.** (1988). Combined toxicity of copper, cadmium, zinc, lead, nickel, and chrome to the copepod *Tisbe holothuriae*. *Bull. Environ. Contam. Toxicol.* **41**, 378–384.
- Viarengo, A.** (1994). Heavy metal cytotoxicity in marine organisms: effects on Ca<sup>2+</sup> homeostasis and possible alteration of signal transduction pathways. In *Advances in Comparative and Environmental Physiology: Volume 20* (ed. Arpigny, J. L.), Coyette, J.), Davail, S.), Feller, G.), Fonzé, E.), Foulkes, E. C.), Frère, J.-M.), Fujii, R.), Génicot, S.), Gerday, Ch.), et al.), pp. 85–110. Berlin, Heidelberg: Springer Berlin Heidelberg.
- von Stackelberg, K., Guzy, E., Chu, T. and Henn, B. C.** (2013). Mixtures, metals, genes and pathways: a systematic review. pp. 1–67. Harvard Center for Risk Analysis.
- Wu, C., Gu, X., Ge, Y., Zhang, J. and Wang, J.** (2006). Effects of high fluoride and arsenic on brain biochemical indexes and learning-memory in rats. *Fluoride* **39**, 274–279.
- Wu, X., Cobbina, S. J., Mao, G., Xu, H., Zhang, Z. and Yang, L.** (2016). A review of toxicity and mechanisms of individual and mixtures of heavy metals in the environment. *Environ. Sci. Pollut. Res.* **23**, 8244–8259.
- Xun, E., Zhang, Y., Zhao, J. and Guo, J.** (2018). Heavy metals in nectar modify behaviors of pollinators and nectar robbers: consequences for plant fitness. *Environ. Pollut.* **242**, 1166–1175.
- Yao, J., Zhu, Y. C., Adamczyk, J. and Luttrell, R.** (2018). Influences of acephate and mixtures with other commonly used pesticides on honey bee (*Apis mellifera*) survival and detoxification enzyme activities. *Comp. Biochem. Physiol. Part C Toxicol. Pharmacol.* **209**, 9–17.
- Zaman, K., MacGill, R. S., Johnson, J. E., Ahmad, S. and Pardini, R. S.** (1995). An insect model for assessing oxidative stress related to arsenic toxicity: arsenic toxicity and oxidative stress. *Arch. Insect Biochem. Physiol.* **29**, 199–209.
- Zamberlan, D. C.** (2020). Copper decreases associative learning and memory in *Drosophila melanogaster*. *Sci. Total Environ.* **9**, 1–14.
- Zhu, Y. C., Yao, J., Adamczyk, J. and Luttrell, R.** (2017). Synergistic toxicity and physiological impact of imidacloprid alone and binary mixtures with seven representative pesticides on honey bee (*Apis mellifera*). *PLOS ONE* **12**, e0176837.

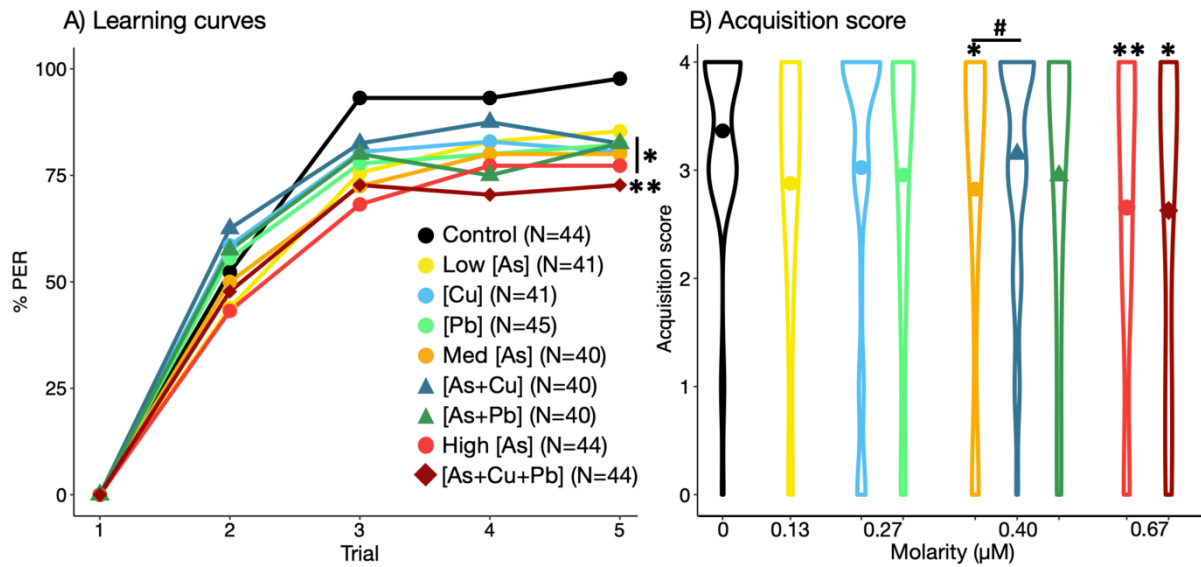

**Figure 1: Learning.** **A)** Learning curves show changes in the percentages of honey bees displaying the conditioned proboscis extension response (PER) over five training trials. Asterisks indicate significant differences in response rates at the last trial compared to control honey bees. **B)** Violin plots of acquisition score values (sum of conditioned responses for each honey bee). Symbols (*circle*: single exposure; *triangle*: binary mixture; *diamond*: tertiary mixture) indicate the mean score for each treatment. Significant differences between groups exposed to the same molarity solutions (#) or with respect to control honey bees (\*) are indicated (#/\* $p < 0.05$ , \*\* $p < 0.01$ ; GLMM).



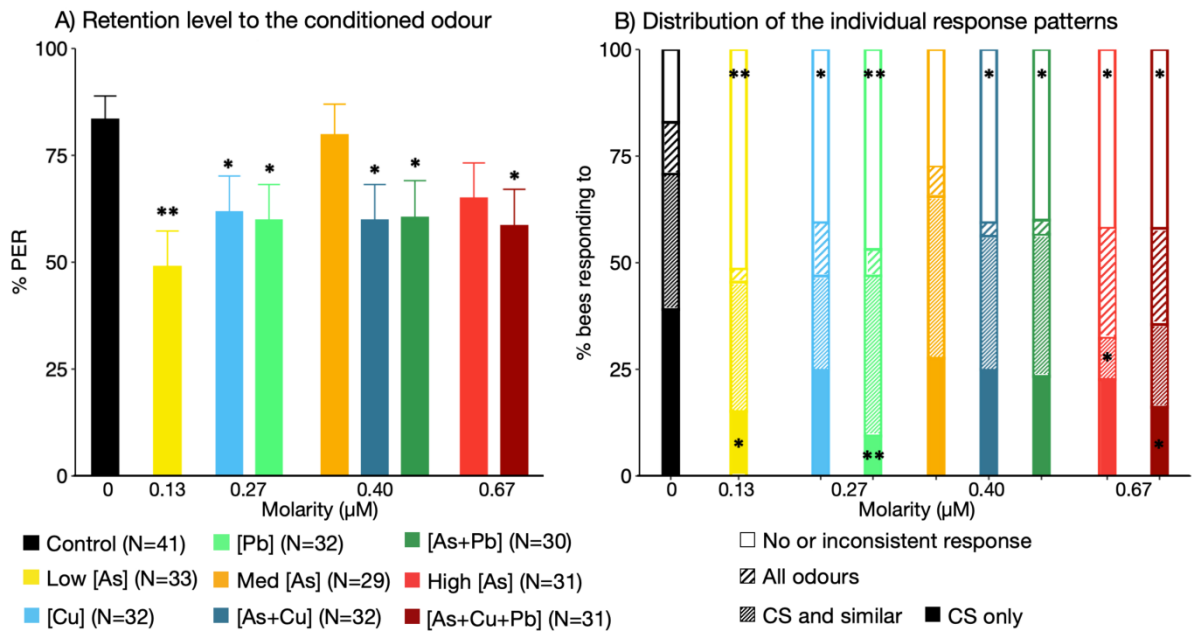

**Figure 2: Long-term memory.** **A)** Percentages of responses to the CS odour in the 24 h-memory retention test (mean  $\pm$  s.e.m). **B)** Distribution of honey bees according to their individual response pattern during the long-term memory test: response to CS only; response to CS and similar; response to all odours; no or inconsistent response. Significant differences with controls are indicated (\* $p < 0.05$ , \*\* $p < 0.01$ ; GLMM).

**Table 1: Concentrations used.** Combined treatments are shown in grey.

| Treatment  | Molarity ( $\mu\text{M}$ ) | Concentration ( $\text{mg}\cdot\text{L}^{-1}$ ) |      |      | Ingestion of 5 $\mu\text{L}$ (ng/bee) |      |      |
|------------|----------------------------|-------------------------------------------------|------|------|---------------------------------------|------|------|
|            |                            | As                                              | Cu   | Pb   | As                                    | Cu   | Pb   |
| Control    | 0                          | 0                                               | 0    | 0    | 0                                     | 0    | 0    |
| Low [As]   | 0.13                       | 0.01                                            | 0    | 0    | 0.05                                  | 0    | 0    |
| [Cu]       | 0.27                       | 0                                               | 0.02 | 0    | 0                                     | 0.09 | 0    |
| [Pb]       | 0.27                       | 0                                               | 0    | 0.06 | 0                                     | 0    | 0.28 |
| Med [As]   | 0.40                       | 0.03                                            | 0    | 0    | 0.15                                  | 0    | 0    |
| [As+Cu]    | 0.40                       | 0.01                                            | 0.02 | 0    | 0.05                                  | 0.09 | 0    |
| [As+Pb]    | 0.40                       | 0.01                                            | 0    | 0.06 | 0.05                                  | 0    | 0.28 |
| High [As]  | 0.67                       | 0.05                                            | 0    | 0    | 0.25                                  | 0    | 0    |
| [As+Cu+Pb] | 0.67                       | 0.01                                            | 0.02 | 0.06 | 0.05                                  | 0.09 | 0.28 |

**Table S1: Concentrations of As, Cu and Pb reported in water, honey and honey bee worldwide.** Mean (minimal-maximal) values are reported. NA: not available.

| Matrix                         | Location                                  | As                                   | Cu                         | Pb                         | Concentration                                  |
|--------------------------------|-------------------------------------------|--------------------------------------|----------------------------|----------------------------|------------------------------------------------|
| Water<br>(mg.L <sup>-1</sup> ) | Former mining area, France                | 0.02 (0.002-0.11)<br>2.56 (0.03-7.6) | 0.003 (0.0005-0.006)<br>NA | 0.28 (0.0003-0.0009)<br>NA | (Khaska et al., 2018)<br>(Guerin et al., 2000) |
|                                | Mining area, Turkey                       | 0.10                                 | 0.07                       | 0.01                       | (Sasmaz et al., 2015)                          |
|                                | Honey                                     | 0.03 (0.01-0.15)                     | 1.53 (0.05-58.81)          | 0.09 (0.01-1.20)           | (Bilandžić et al., 2011)                       |
| Honey<br>(mg.L <sup>-1</sup> ) | Hungary                                   | 0.03                                 | 0.29                       | 0.07                       | (Ajtony et al., 2007)                          |
|                                | Italy                                     | 0.01 (0.004-0.029)                   | 1.29 (0.25-8.41)           | 0.11 (0.04-0.43)           | (Pisani et al., 2008)                          |
|                                | Post-mining area, Italy                   | NA                                   | NA                         | 0.06 (0.01-0.21)           | (Satta et al., 2012)                           |
|                                | Industrial area, Serbia                   | 0.05 (0.03-0.08)                     | NA                         | NA                         | (Krunić et al., 1989)                          |
|                                | Turkey                                    | NA                                   | 0.02 (0.01-0.05)           | 0.02 (0.01-0.09)           | (Silici et al., 2008)                          |
|                                | Worldwide                                 | 0.07 (0-0.14)                        | 2.84 (0.07-24.65)          | 0.61 (0.001-4.61)          | (Solayman et al., 2016)                        |
|                                | Honey bee<br>(mg.kg <sup>-1</sup><br>d.w) | Urban area, Italy                    | 0.027 (0.07-0.34)          | 12.82 (7.44-27.09)         | 0.113 (0.02-0.39)                              |
| Industrial site, Italy         |                                           | 1.95 (1.51-2.68)                     | 5.42 (3.22-7.77)           | 0.16 (0.06-0.28)           | (Salvaggio et al., 2017)                       |
| The Netherlands                |                                           | 0.714 (0.67-0.83)                    | 15.21 (11.65-19.77)        | 0.571 (0.19-1.67)          | (van der Steen et al., 2012)                   |

## References

- Ajtony, Z., Bencs, L., Haraszi, R., Szigeti, J. and Szoboszlai, N.** (2007). Study on the simultaneous determination of some essential and toxic trace elements in honey by multi-element graphite furnace atomic absorption spectrometry. *Talanta* **71**, 683–690.
- Bilandžić, N., Đokić, M., Sedak, M., Kolanović, B. S., Varenina, I., Končurat, A. and Rudan, N.** (2011). Determination of trace elements in Croatian floral honey originating from different regions. *Food Chem.* **128**, 1160–1164.

- Giglio, A., Ammendola, A., Battistella, S., Naccarato, A., Pallavicini, A., Simeon, E., Tagarelli, A. and Giulianini, P. G.** (2017). *Apis mellifera ligustica*, Spinola 1806 as bioindicator for detecting environmental contamination: a preliminary study of heavy metal pollution in Trieste, Italy. *Environ. Sci. Pollut. Res.* **24**, 659–665.
- Guerin, T., Molenat, N., Astruc, A. and Pinel, R.** (2000). Arsenic speciation in some environmental samples: a comparative study of HG-GC-QFAAS and HPLC-ICP-MS methods. *Appl. Organomet. Chem.* **14**, 401–410.
- Khaska, M., Le Gal La Salle, C., Sassine, L., Cary, L., Bruguier, O. and Verdoux, P.** (2018). Arsenic and metallic trace elements cycling in the surface water-groundwater-soil continuum down-gradient from a reclaimed mine area: Isotopic imprints. *J. Hydrol.* **558**, 341–355.
- Krunić, M. D., Terzić, L. R. and Kulinčević, J. M.** (1989). Honey resistance to air contamination with arsenic from a copper processing plant. *Apidologie* **20**, 251–255.
- Pisani, A., Protano, G. and Riccobono, F.** (2008). Minor and trace elements in different honey types produced in Siena County (Italy). *Food Chem.* **107**, 1553–1560.
- Salvaggio, A., Pecoraro, R., Scalisi, E. M., Tibullo, D., Lombardo, B. M., Messina, G., Loreto, F., Copat, C., Ferrante, M., Avola, R., et al.** (2017). Morphostructural and immunohistochemical study on the role of metallothionein in the detoxification of heavy metals in *Apis mellifera* L., 1758. *Microsc. Res. Tech.* **80**, 1215–1220.
- Sasmaz, M., Arslan Topal, E. I., Obek, E. and Sasmaz, A.** (2015). The potential of *Lemna gibba* L. and *Lemna minor* L. to remove Cu, Pb, Zn, and As in gallery water in a mining area in Keban, Turkey. *J. Environ. Manage.* **163**, 246–253.
- Satta, A., Verdinelli, M., Ruiu, L., Buffa, F., Salis, S., Sassu, A. and Floris, I.** (2012). Combination of beehive matrices analysis and ant biodiversity to study heavy metal pollution impact in a post-mining area (Sardinia, Italy). *Environ. Sci. Pollut. Res.* **19**, 3977–3988.
- Silici, S., Uluozlu, O. D., Tuzen, M. and Soylak, M.** (2008). Assessment of trace element levels in Rhododendron honeys of Black Sea Region, Turkey. *J. Hazard. Mater.* **156**, 612–618.
- Solayman, Md., Islam, Md. A., Paul, S., Ali, Y., Khalil, Md. I., Alam, N. and Gan, S. H.** (2016). Physicochemical properties, minerals, trace elements, and heavy metals in honey of different origins: a comprehensive review. *Compr. Rev. Food Sci. Food Saf.* **15**, 219–233.
- van der Steen, J. J. M., de Kraker, J. and Grotenhuis, T.** (2012). Spatial and temporal variation of metal concentrations in adult honeybees (*Apis mellifera* L.). *Environ. Monit. Assess.* **184**, 4119–4126.
